# Supplementary material
Source: PubMed Central journal article supplement (PMC3091935)

**Appendix 1 (as submitted by the authors): Flow chart diagram of the National Population Health Survey (NPHS) sample, followed every two years from 1994/5 to 2006/7**

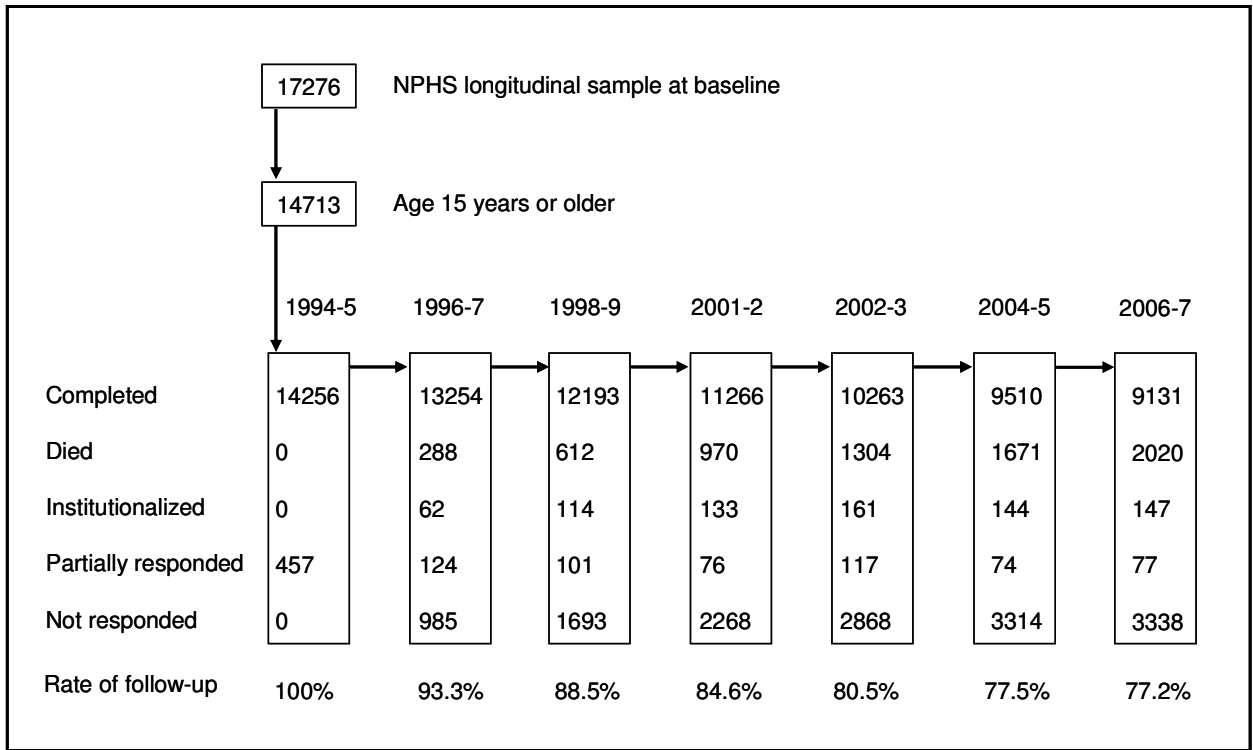

Supplement: 101271_1.pdf [file 101271_1.pdf]
