# Supplementary material
Source: PubMed Central journal article supplement (PMC3091935)
Supplement: 101271_2.pdf [file 101271_2.pdf]

**Appendix 2 (as submitted by the authors): The 42 variables constituting the Frailty Index: percent present at each of the seven cycles**

| Variable name                              | 1994-5 | 1996-7 | 1998-9 | 2000-1 | 2002-3 | 2004-5 | 2006-7 |
|--------------------------------------------|--------|--------|--------|--------|--------|--------|--------|
|                                            | (%)    | (%)    | (%)    | (%)    | (%)    | (%)    | (%)    |
| long term disabilities or handicaps        | 17.1   | 16.4   | 16.1   | 15.5   | 18.2   | 19.9   | 21.4   |
| restriction of activity due to poor health | 23.1   | 22.7   | 22.6   | 22.5   | 27.0   | 28.5   | 30.8   |
| help for preparing meals                   | 2.3    | 2.7    | 3.1    | 3.3    | 3.8    | 3.9    | 4.0    |
| help for shopping for necessities          | 4.2    | 4.9    | 5.4    | 5.7    | 6.7    | 7.1    | 7.2    |
| help for house work                        | 4.8    | 5.6    | 6.1    | 6.5    | 7.5    | 7.9    | 8.6    |
| help for heavy household chores            | 10.2   | 13.5   | 14.8   | 16.3   | 18.3   | 18.7   | 18.4   |
| help for personal care                     | 1.4    | 2.1    | 2.7    | 3.3    | 3.5    | 3.7    | 3.8    |
| help for moving inside house               | 0.9    | 1.6    | 2.1    | 2.3    | 2.4    | 2.8    | 2.4    |
| food allergies                             | 5.8    | 7.3    | 7.4    | 7.2    | 9.1    | 9.3    | 9.8    |
| asthma                                     | 6.0    | 7.0    | 7.5    | 8.1    | 8.2    | 8.7    | 8.7    |
| arthritis or rheumatism                    | 16.7   | 19.8   | 21.4   | 19.8   | 23.9   | 26.7   | 28.4   |
| back problems other than arthritis         | 15.2   | 15.8   | 15.7   | 16.1   | 19.1   | 19.3   | 20.3   |
| high blood pressure                        | 11.2   | 13.3   | 14.9   | 17.1   | 19.6   | 21.8   | 24.1   |
| migraine headaches                         | 7.6    | 8.0    | 8.2    | 9.3    | 9.5    | 9.4    | 9.4    |
| chronic bronchitis or emphysema            | 3.6    | 3.5    | 3.2    | 3.0    | 3.2    | 3.3    | 3.2    |
| diabetes                                   | 3.6    | 4.1    | 4.6    | 5.2    | 6.3    | 7.0    | 7.8    |
| epilepsy                                   | 0.6    | 0.7    | 0.7    | 0.8    | 0.8    | 0.9    | 0.8    |
| heart disease                              | 5.1    | 5.5    | 5.9    | 6.3    | 6.9    | 7.0    | 7.5    |
| cancer                                     | 1.9    | 1.8    | 2.0    | 2.1    | 2.0    | 2.3    | 2.1    |
| stomach or intestinal ulcers               | 4.0    | 3.7    | 3.6    | 3.7    | 3.4    | 3.2    | 3.1    |
| effects of a stroke                        | 1.1    | 1.4    | 1.6    | 1.8    | 1.9    | 2.1    | 1.9    |
| problems with urinary incontinence         | 1.3    | 2.3    | 3.3    | 3.2    | 4.7    | 4.8    | 5.6    |
| dementia                                   | 0.1    | 0.6    | 0.8    | 0.9    | 1.1    | 1.3    | 1.3    |
| cataracts                                  | 3.5    | 4.3    | 4.7    | 5.1    | 6.0    | 6.3    | 5.9    |
| glaucoma                                   | 1.3    | 1.5    | 1.8    | 1.8    | 2.2    | 2.3    | 2.5    |
| other chronic conditions                   | 7.2    | 7.0    | 7.8    | 9.1    | 12.3   | 13.6   | 16.1   |
| vision problem                             | 3.1    | 2.3    | 2.9    | 2.2    | 2.3    | 2.5    | 2.2    |
| hearing problem                            | 2.4    | 1.7    | 2.3    | 1.5    | 1.8    | 1.9    | 2.0    |
| walking difficulty                         | 4.5    | 4.9    | 5.4    | 5.6    | 6.7    | 7.1    | 7.8    |
| dexterity problem                          | 1.2    | 1.4    | 1.4    | 1.3    | 1.3    | 1.2    | 1.4    |
| cognitive problem                          | 26.2   | 19.0   | 21.4   | 20.1   | 23.6   | 24.8   | 26.2   |
| body pain prevents activities              | 17.9   | 14.9   | 16.2   | 15.9   | 17.3   | 18.6   | 18.9   |
| speech problem                             | 1.2    | 0.7    | 1.0    | 0.7    | 0.8    | 0.9    | 1.1    |
| depression                                 | 11.6   | 8.3    | 8.3    | 8.5    | 9.2    | 9.1    | 8.8    |
| difficulty carrying light weights          | 1.2    | 1.4    | 1.4    | 1.3    | 1.3    | 1.2    | 1.4    |
| unhappy                                    | 3.7    | 3.5    | 3.7    | 4.0    | 4.1    | 4.1    | 4.1    |
| less activity at home, work, or school     | 18.2   | 16.9   | 17.0   | 17.8   | 21.7   | 21.7   | 24.2   |
| feel hopeless                              | 6.8    | 5.3    | 5.1    | 5.2    | 5.0    | 5.4    | 5.4    |
| lost weight                                | 2.7    | 1.7    | 1.7    | 1.7    | 1.9    | 1.8    | 1.8    |
| self-reported poor health                  | 2.9    | 2.6    | 2.7    | 3.4    | 3.5    | 3.5    | 3.8    |
| difficulty with problem solving            | 14.3   | 7.8    | 9.1    | 8.2    | 10.2   | 10.5   | 11.4   |
| always feel tired                          | 5.9    | 4.4    | 4.6    | 5.1    | 5.0    | 5.1    | 5.0    |
